# Supplementary material for: Genes Impacting Grain Weight and Number in Wheat (Triticum aestivum L. ssp. aestivum)
Source: MDPI journal article supplement (doi:10.3390/plants11131772), 2022-07-04
Supplement: s1 [file s1]

**Supplementary Table S1.** Primers utilized to sequence genes discussed in review. Citations reference initial publication of primer sequences.

| Gene          | Name                 | Forward                   | Reverse                   | Citation |
|---------------|----------------------|---------------------------|---------------------------|----------|
| <b>TaGS5</b>  | TaGS5-P1             | CAAGCCACTCACTCTCACAT      | TCCTTGAACCTATTTTGGGTCA    | [17]     |
|               | TaGS5-P2             | AGCCACTCACTCTCACATTG      | GATCAGCGCTATCCCTTCTG      |          |
|               | TaGS5-P3             | AGCCAAGCCACTCACTCT        | AGAAGGAATGTGTCGATCAGC     |          |
|               | TaGS5-P4             | AGCCAAGCCACTCACTCT        | CTCTCCTTGAACCTATTTTGGG    |          |
|               | TaGS5-P5             | GCGAACCAAGACAAGCAG        | CCTTGACTGCGGAAACCTC       |          |
|               | TaGS5-P6             | CTTCTGAGCTAGGACCTCTC      | ACAAGGTCAGCTAGTTGTGG      |          |
|               | TaGS5-P7             | ACATCCTCTGACCTCACCAA      | GATACAACTGCATGGCTCCA      |          |
|               | TaGS5-P8             | TCATTATGTGCCACAAGTAGCT    | AGTACCGAAAAGTTGTACGACT    |          |
|               | TaGS5-P9             | TGTCAATGGGATGTTGCCTG      | TCATCGGTGTGTAGGAAGCTG     |          |
|               | TaGS5-P10            | TCATACACACATAATCCAGTCGA   | GATCGTGGGTGTTGCATCTAT     |          |
|               | TaGS5-P11            | GACTTAGAACACGACAGCC       | CGTAGCATCCATCGGCATG       |          |
|               | TaGS5-P12            | GAGCACAAGAGTGAAGCGAGATGG  | CGTTGTTGGCGTATGCGTCTGA    |          |
|               | TaGS5-P13            | AAGGTCGGGCAAAGTCTATG      | CGAGGAGAAAGAGAGCAAGGA     |          |
|               | TaGS5-P14            | GAAGGCCAGCACATACATCA      | TGTGCCACCTGTCAATTTCTT     |          |
|               | TaGS5-P15            | GAAGGCCAGCACATACATCA      | GCTGCTGATGTTTGTTCCA       |          |
|               | TaGS5-P16            | TAGAGCCTCAAAGTGGACCG      | AGATGCTGATGATGTTTGTTCCA   |          |
| <b>TaGW2</b>  | TaGW2-F/R            | ATGGGGAACAGAATAGGAGGGAGGA | AGAAACAAAACGGCCGAACA      | [25]     |
|               | TaGW2-4F/R           | GCAGAACAATCGCTCCAACA      | GCCAAATCGCTTCCATAACC      |          |
|               | TaGW2A-QF/R          | AAGCATGGGTGCTGCGGAA       | GTCAGCAAAAGGCAACGGTA      |          |
|               | TaGW2B-QF/R          | AACGCCACCGTTGCCTGTTA      | AGAAACAAAACGGCCGAACA      |          |
|               | TaGW2D-QF/R          | AAGCATGGGTGCTGTGGAG       | GCAAAAGGCAACGGTGGCA       |          |
|               | Hap-6A-P1            | CGTTACCTCTGGTTTGGGTGTCG   | CACCTCTCGAAAATCTTCCAAT    | [64]     |
|               | Hap-6A-P2            | GAGAAAGGGCTGGTGCTATGG     | GTAACGCTTGATAAACATAGG     |          |
|               | TaGW2-4              | GCAGAACAATCGCTCCAACA      | GCCAAATCGCTTCCATAACC      |          |
|               | TaGW2-5              | CACTGGAATGGTCAAGGCTG      | CTCCATGTATCCAGTTG         |          |
| <b>TaDA1</b>  | DA1-2A-F1/R1         | ACCTTCCTTTAGTTCTGCATTG    | TACTACCTCCGTCCAGAATAAACT  | [31]     |
|               | DA1-2A-F2/R2         | TCCGGAATTAATTGTTGCTGAA    | TCCAGGCAGAGTTTACGACCA     |          |
|               | DA1-2A-F3/R3         | ACATAAGTTGCTGTCTCAAACC    | CTGCAATCTTAGCACGCAGTAT    |          |
|               | DA1-2A-pF/pR         | TCGCGTTTCAACATTGTTTATGG   | AAGGATGGCATACAATCATCAAGC  |          |
|               | DA1-M2R1             | -                         | ATCAGTAACTGTTTCTATTGC     |          |
|               | DA1-M2F2/R2          | ATGTATTGCTTGATGATGGTCGT   | CCATTGCTTCATTTGAAGCCTTT   |          |
|               | DA1-M3F1/R1          | TCGGGAAAATGGCAGCGATA      | AGCAGTTCAAATGTGTGGCACT    |          |
|               | DA1-2B-2536-F/4718-R | GCTCATTGTATTCTCCAGTCTTCC  | TAATGGTGGTTCAGTTCAGCATAAC |          |
|               | DA1-2D-2735-F/5352-R | CTTCTGATAAGTTGGATTGGCTCTG | AGTATTACAACTAAATGCATGGAT  |          |
| <b>TaCKX6</b> | TaCKX6a01            | GCCTCCTCGCAGAATCGTAAGA    | GGTTCGCGTTCGTGCAGGAC      | [38]     |
|               | TaCKX6a02            | CCGGGACCATGCAAGCAA        | ACAGGTGGGACGGCAACA        |          |
|               | TaCKX6b              | CGGGCAGACACGGGGAAC        | GCAAAGCGCGAGAAATGACAG     |          |

|              |                      |                          |                           |      |
|--------------|----------------------|--------------------------|---------------------------|------|
|              | TaCKX6b01            | GTGCGGACGCTTGCCCTC       | AGCGCGTGCGAGAGAGATGA      |      |
| <b>WAPO1</b> | WAPO-A1-F1/R1        | CGCGCGTGTGGCGCCGC        | AAGGACGGCGTCGGGAGGA       | [45] |
|              | CAPS-WAPO-A1<br>F/R1 | ACTCTCACCTCCTCCACTCC     | TCAAAGGACACAGATCAACC      | [46] |
|              | CAPS-WAPO-B1<br>F/R2 | ACTCTCACCTCCTCCACTCG     | CATAATCAGAAATTTGCACAAGAAC |      |
| <b>TaGNI</b> | GNI-A1               | ACAAAATAGGCGCTATAGCTGCTC | CGGGACAGATGATTTCTAGAGGTT  | [47] |
|              | GNI-B1               | ACAAAATAGGTGCGTTAATTG    | GGTATTTCTGATTCTGCAGC      |      |
|              | GNI-D1               | GCTATGCTATGGCTGCATGC     | GATTAGCGGCGGCCTTTTC       |      |
